# Supplementary material for: Efficient blue–green light emitting poly(1,4-phenylene vinylene) copolymers
Source: Royal Society of Chemistry journal article supplement (doi:10.1039/a909382f), 2000-01-01
Supplement: a909382f.doc [file a909382f.doc]

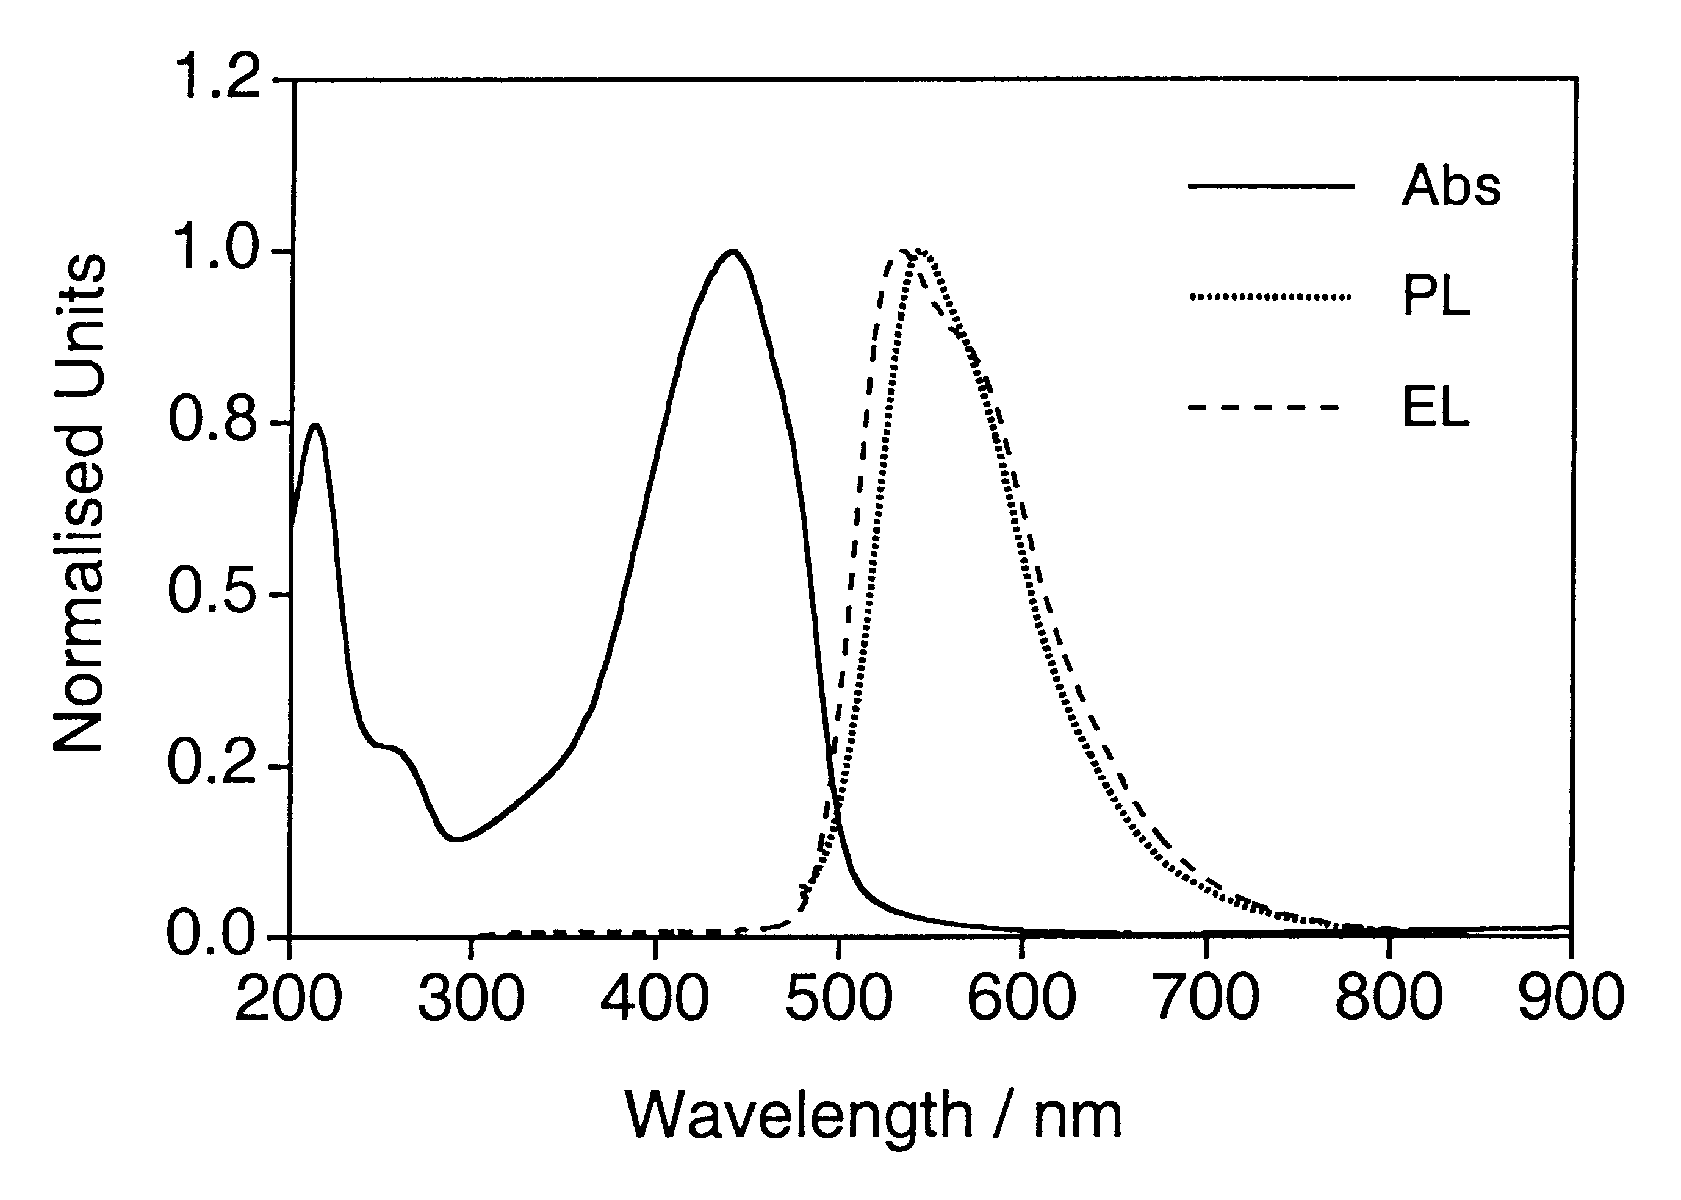
**Fig. S1**  Normalised optical absorption, photoluminescence (PL) and electroluminescence (EL) spectra of BDMOS-DB-PPV. PL and absorption spectra were measured on spin-coated films on quartz. EL spectra are for devices in the configuration ITO/PEDOT (80 nm) /BDMOS-DB-PPV (80 nm)/Ca devices.

**Fig. S2**  Cyclic voltammograms of BDMOS-DB-PPV were measured as thin films on Pt disk electrodes in MeCN using *n*-Bu4NClO4 (0.10 mol l-1) as conducting electrolyte at room temp. (scan rate: 100 mV s-1). Ag/AgCl was used as a reference electrode, which was referenced against Fc/Fc+ (+0.43 V). The right hand CV is for oxidation, whereas the
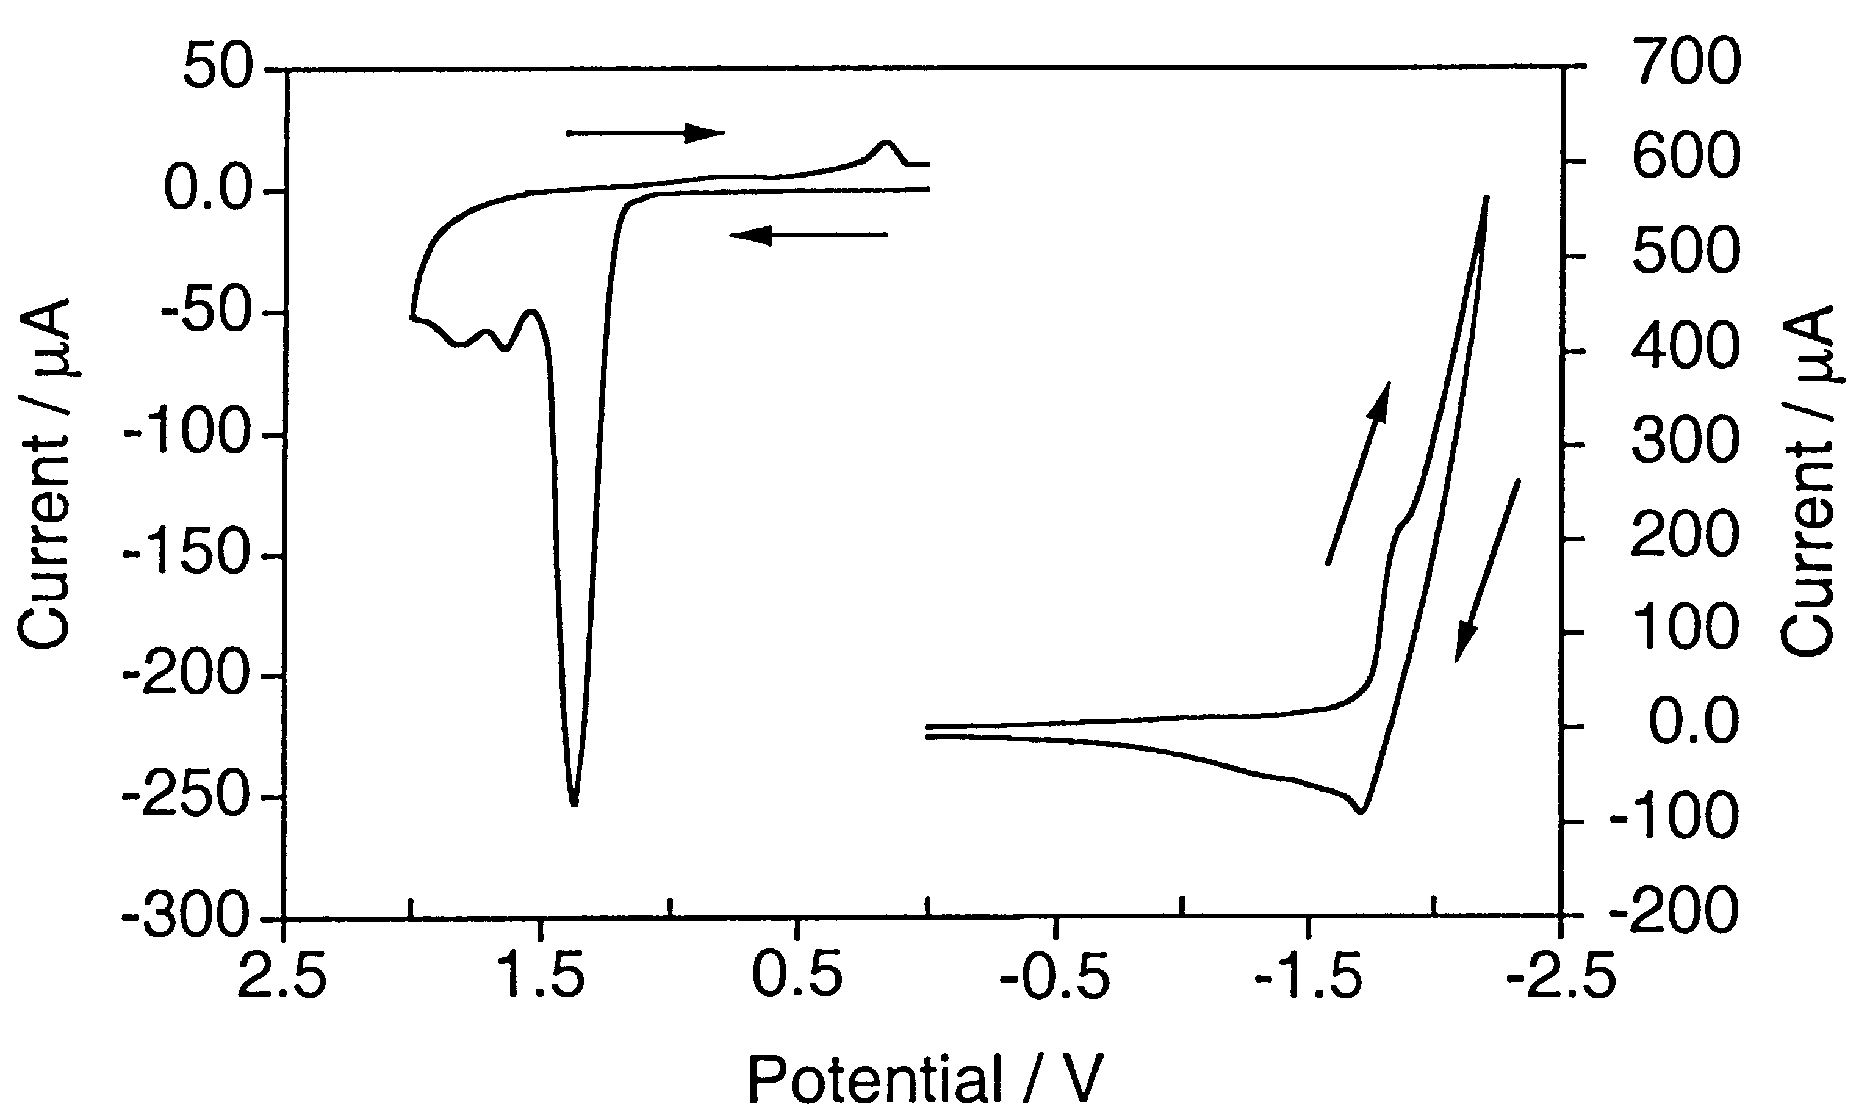
left hand is for reduction.
